1 **Cognitive functions and jugular venous reflux in severe mitral regurgitation**

2 Shih-Hsien Sung<sup>1,2,3</sup>, Ching-Wei Lee<sup>1,2</sup>, Pei-Ning Wang<sup>4,5,6</sup>, Hsiang-Ying Lee<sup>4</sup>, Chen-Huan

3 Chen<sup>1,2,3,7</sup>, Chih-Ping Chung<sup>4,5\*</sup>

4 <sup>1</sup>Division of Cardiology, Department of Medicine; <sup>4</sup>Department of Neurology, Neurological Institute  
5 and <sup>7</sup>Department of Medical Education, Taipei Veterans General Hospital, Taiwan

6 <sup>2</sup>Cardiovascular Research Center; <sup>3</sup>Institute of Public Health; <sup>5</sup>School of Medicine and <sup>6</sup>Brain  
7 Research Center, National Yang Ming University, Taipei, Taiwan

8

9 \*Corresponding author

10 E-mail: pin324pin324@gmail.com

11

12

## 13 **Abstract**

14 Cardiac diseases with elevated central venous pressure have higher frequency of jugular venous  
15 reflux (JVR), which is associated with decreased cerebral blood flow and white matter  
16 hyperintensities. Whether patients with severe mitral-regurgitation (SMR) have poorer cognitive  
17 functions and whether JVR is involved were determined. Patients with SMR and age/sex-matched  
18 controls were prospectively recruited. Neuropsychological tests such as global cognitive  
19 (Mini-Mental State Examination, MMSE), verbal memory, executive, and visuospatial domains were  
20 performed. Cardiac parameters by cardiac catheterisation and echocardiography, and the frequency  
21 of JVR by colour-coded duplex ultrasonography were obtained. Forty patients with SMR and 40  
22 controls (71.1±12.2, 38–89 years; 75% men) were included. Compared with the controls, patients  
23 with SMR had lower scores in all neuropsychological tests but only MMSE and visuospatial test  
24 scores were statistically significant after adjusting for age, sex, and educational level. We further  
25 adjusted for cardiovascular risk factors; the significance remained in the visuospatial test but  
26 diminished in MMSE. Multivariate linear regression analyses adjusted for age, sex, and educational  
27 level showed that JVR combined with high right-atrial-pressure (RAP > 50th-percentile, 12 mmHg)  
28 was significantly associated with poorer performances in both MMSE [right JVR: B coefficient(95%  
29 confidence interval,  $p$ )=-2.83(-5.46–0.20, 0.036); left JVR: -2.77(-5.52–0.02, 0.048)] and  
30 visuospatial test [right JVR: -4.52(-8.89–0.16, 0.043); left JVR: -4.56(-8.81–0.30, 0.037)], with  
31 significances that remained after further adjusting for cardiovascular risk factors. Our results suggest

32 that retrogradely-transmitted venous pressure might be involved in the mechanisms mediating the

33 relationship between cardiac diseases and brain functions.

34

35

## 36 **Introduction**

37 Cerebral venous drainage impairment with elevated venous pressure would decrease cerebral  
38 blood flow (CBF), damage the blood–brain barrier (BBB), and lead to brain dysfunctions [1,2].  
39 Internal jugular vein (IJV) is the largest extracranial vein for cerebral venous drainage [1]. Jugular  
40 venous reflux (JVR) indicates a retrograde flow in IJV, which usually occurs when the reversed  
41 pressure gradient was elevated beyond the capacity of the IJV valves [3]. We previously showed that  
42 during Valsalva’s manoeuvre (VM), people with JVR would decrease CBF and dilate retinal  
43 venules more than ones without JVR [4,5]. In addition, JVR has been found to be associated with  
44 white matter hyperintensities (WMH) in the elderly people [6]. These results indicate that JVR might  
45 influence CBF, cerebral microvessels, and brain tissues via elevated venous pressure retrogradely  
46 transmitted into the cerebral venous system.

47 Continuous or repeated elevated venous pressure proximal to IJV might result in wear and tear  
48 of the IJV valves and lead to valvular incompetence [3,7,8]. Indeed, certain cardiac diseases with  
49 increased central venous pressure such as heart failure or valvular heart disease have a higher  
50 frequency of JVR [7,8]. Recently, the number of studies that have reported cognitive impairment in  
51 patients with cardiac diseases has been increasing [9]. However, whether cerebral venous return  
52 status is a factor involved in the relationship between cardiac diseases and cognitive function remains  
53 to be elucidated. The present study compared neuropsychological performances between patients  
54 with severe mitral valve regurgitation (SMR) and age- and sex-matched normal controls. Patients

55 with SMR will encounter pulmonary venous hypertension at the beginning, followed by combined  
56 pre and post-capillary pulmonary hypertension during disease progression [10,11]. The right  
57 ventricular pressure, as well as the right atrial pressure (RAP), increased thereafter, which may lead  
58 to IJV valvular incompetence and compromise the cerebral venous return [10,11]. We hypothesised  
59 that patients with SMR have poorer cognitive functions and the presence of JVR and/or elevated  
60 RAP might be associated with cognitive impairment in these patients.

61

## 62 **Materials and Methods**

### 63 Study population

64 Patients with SMR, referred for surgical intervention in a tertiary medical centre, were eligible  
65 for this study. Every patient underwent transthoracic and transoesophageal echocardiography and  
66 cardiac catheterisation to confirm the diagnosis and to evaluate the feasibility for surgery. Patients  
67 who had disease durations of 1 year or longer from the initial diagnosis to the time of catheterisation  
68 and echocardiography were included. Among the eligible patients, those who met the following  
69 criteria were excluded from this analysis: (1) had concomitant severe aortic valve disease, mitral  
70 stenosis, acute coronary syndrome, or pericardial disease; (2) had unstable haemodynamics, or New  
71 York Heart Association functional class IV symptoms; (3) had existing neurological diseases, such  
72 as stroke, brain tumour, dementia, or other neurodegenerative diseases; and (4) had significant  
73 stenosis (>50%) over the cervical internal carotid and vertebral arteries using neck duplex

74 sonography. Cardiac diseases other than mitral valvular disease were excluded because they might  
75 have different mechanisms and effects on the cognitive functions. A total of 40 individuals were  
76 included based on these criteria. We also recruited 40 age- and sex-matched normal controls from  
77 outpatients who visited our neurological clinics. These normal controls had no cardiac, neurological,  
78 or malignant medical histories.

79 Cardiovascular risk factors were either measured or assessed through self-report. The presence  
80 of hypertension was determined by a self-report of current antihypertensive medication prescription  
81 or by a measurement of either systolic BP of  $\geq 140$  mmHg or diastolic BP  $\geq 90$  mmHg [12]. Diabetes  
82 mellitus (DM) was defined by either a self-report of current DM medication or a measurement of  
83 haemoglobin A1c (HgbA1c) of  $\geq 6.5\%$  [13]. Chronic kidney disease (CKD) was defined according to  
84 an estimated glomerular filtration rate (eGFR) of  $\leq 60$  mL/min/1.73 m<sup>2</sup> [14]. The design of this study  
85 was reviewed and approved by the institutional review board of Taipei Veterans General Hospital.

86

## 87 Cardiac Catheterisation

88 Cardiac catheterisation was performed in all patients with SMR using a percutaneous approach  
89 via the radial artery for coronary angiogram and right IJV for right heart catheterisation. Data of  
90 mean pulmonary artery wedge pressure (PAWP), pulmonary artery pressure (PAP), right ventricular  
91 pressure (RVP), RAP, mixed venous oxygen saturation (SvO<sub>2</sub>), and cardiac output were obtained.  
92 Cardiac output was then divided by body surface area (BSA) to obtain the cardiac index.

93

## 94 Echocardiography

95 A comprehensive two-dimensional, M-mode, and Doppler echocardiogram was performed by a  
96 skilled echocardiographer using commercially available echocardiographic devices (Philip IE33,  
97 Andover, MA, USA) following a standardised protocol. The severity of mitral regurgitation was  
98 evaluated according to the AHA/ACC guideline, and an effective regurgitant orifice of  $\geq 0.4 \text{ cm}^2$  was  
99 referred as SMR [15]. Both left and right heart structures and functions were obtained, including left  
100 ventricular end-diastolic and end-systolic dimension, left atrial dimension, left atrial volume, and  
101 estimated right ventricular systolic pressure. Left ventricular ejection fraction (LVEF) was obtained  
102 using biplane Simpson's method, and left ventricular mass was measured using the area-length  
103 method. The peak trans-mitral filling velocity at early diastole (E), septal mitral annulus moving  
104 velocity at early diastole ( $e'$ ), and E/ $e'$  ratio were also obtained. All parameters were measured in  
105 triplicate and averaged according to the guideline of the American Society of Echocardiography.  
106 Decompensated heart failure was defined as reduced LVEF ( $< 35\%$ ) with chronic clinical symptoms  
107 ( $\geq 6$  months) of New York Heart Association functional class III–IV.

108

## 109 Colour-coded duplex ultrasonography: JVR determination

110 Neck colour-coded duplex sonography was performed in all patients with SMR using a 7-MHz  
111 linear transducer (iU22; Philips, New York, NY, USA) by the same technician who was blinded to

112 subjects' characteristics. On examination, subjects were in a head-straight, flat supine position after a  
113 quiet 10-min rest. The IJV was initially insonated longitudinally and thoroughly from the proximal  
114 part of the neck base rostrally to the distal part of the submandibular level to detect any possible  
115 spontaneous JVR at baseline. Then, the VM was performed by forcible expiration by the subject via  
116 the mouth into a flexible rubber tube connected to a manometer. Subjects were asked to reach the 40  
117 mmHg Valsalva pressure and maintain it for at least 10 s. During the VM, the distal margin window  
118 of the colour signal was placed at the tip of the flow divider of the internal carotid artery. The  
119 coloured box was adjusted to include the entire lumen of the IJV; if retrograde colour appeared in the  
120 centre of the lumen, the retrograde flow would then be confirmed by Doppler spectrum. JVR was  
121 determined when the retrograde-flow colour in the centre of the lumen and the Doppler-flow  
122 waveform demonstrated reversed flow for >0.5 s spontaneously or/and during VM [3-6].

123       Routine cervical arterial examination including examination of internal carotid and vertebral  
124 arteries was also performed in all patients with SMR.

125

## 126 Cognitive Function Assessment

127       All patients with SMR and normal controls underwent a face-to-face neuropsychological  
128 examination carried out by trained interviewers. In addition to the global cognitive performance,  
129 which was examined using the Mini-Mental State Examination (MMSE), three different cognitive  
130 domains (verbal memory, visuospatial function, and executive function) were assessed using



131 extensive neuropsychological tests as follows:

- 132 - Verbal memory: delayed (10 min) free recall in the Chinese Version of the Verbal Learning Test  
133 (CVVLT) [16].
- 134 - Visuospatial function: the copy of the Taylor complex figure test [17].
- 135 - Executive function: digit backward test [18].

136

### 137 Statistical analysis

138 Analyses were performed using SPSS software (v22.0, IBM, Armonk, NY, USA). All  
139 continuous variables are described as mean  $\pm$  standard deviation (SD) and discrete variables as  
140 percentages. Comparisons of case and control were made using non-parametric Mann–Whitney tests.  
141 When appropriate, chi-square ( $\chi^2$ ) or Fisher’s exact tests were performed for categorical variables.  
142 Univariate and multivariate linear regression analyses of neuropsychological test scores as the  
143 dependent variable were performed. Adjusted confounding factors were age, sex, educational level,  
144 and cardiovascular risk factors (hypertension, DM, hyperlipidaemia, cigarette smoking, alcohol  
145 consumption, and CKD).

146 To test our postulation that cerebral venous return status might be involved in the relationship  
147 between cognitive impairment and SMR, we analysed the hemodynamic parameters that may affect  
148 cerebral venous return, e.g., the RAP and presence of JVR, as independent variables individually.  
149 We also used the 50th percentile of the mean RAP, with 12 mmHg as a cut-off point. Three kinds of

150 binary category variables, (1)  $RAP \geq$  and  $<12$  mmHg, (2) the presence or absence of JVR, and (3)  
151 the presence or absence of combined JVR and high RAP ( $\geq 12$  mmHg), were individually analysed as  
152 independent variables. Furthermore, since decreased cardiac output is commonly postulated as a  
153 contributor to cognitive impairment in cardiac diseases, we also put cardiac index and LVEF into  
154 analyses.

155

## 156 **Results**

157 Table 1 shows the demographics and neuropsychological test scores of 40 patients with SMR  
158 and 40 age-/sex-matched control. The patient group had higher frequency of cardiovascular risk  
159 factors, except cigarette smoking; however, the difference was statistically significant only in the  
160 frequency of CKD. Among the patients with SMR, 10 (25%) had decompensated heart failure.

161 The patient group had lower scores in all neuropsychological tests compared with control group,  
162 but only statistically significant in MMSE and Taylor complex figure test and borderline significant  
163 in digit backward test after adjusting for age, sex, and educational level. We further adjusted for  
164 cardiovascular risk factors, with significance remaining in the Taylor complex figure test ( $p = 0.046$ ),  
165 but lower in MMSE ( $p = 0.058$ ).

166 Table 2 shows the hemodynamic parameters measured by cardiac catheterization and the  
167 frequency of JVR detected by color-coded duplex ultrasonography in SMR patients. An elevated  
168 mean RAP and high frequency of JVR were observed in patients with SMR.

169 We then performed multivariate analyses to test which haemodynamic parameter was  
170 associated with poorer cognitive domains, e.g., MMSE and the Taylor complex figure test, in  
171 patients with SMR (Table 3). Multivariate analyses adjusted for age, sex, and educational level  
172 showed that cardiac index, LVEF, mean RAP, high mean RAP ( $\geq 12$  mmHg), or presence of right or  
173 left JVR were not associated with the MMSE and Taylor complex figure test scores. However, JVR  
174 combined with high mean RAP was significantly associated with poorer performances both in  
175 MMSE and Taylor complex figure test. The significances remained after further adjusting for  
176 cardiovascular risk factors. We also divided patients into four groups according to the presence of  
177 absence of JVR and high mean RAP. Fig 1 shows the mean scores of MMSE and Taylor complex  
178 figure test of the four groups. Cognitive functions in patients with isolated JVR or high mean RAP  
179 were not poorer than those with the absence of JVR and high mean RAP; however, JVR combined  
180 with high mean RAP had the lowest scores in both MMSE and Taylor complex figure test among the  
181 four groups. Multivariate analyses showed that patients in the group of JVR combined with high  
182 mean RAP had significantly poorer performances in both MMSE and Taylor complex figure test  
183 compared with those in the other three groups.

184

## 185 **Discussion**

186 The main findings were that patients with SMR had (1) poorer global cognitive (MMSE) and  
187 visuospatial (the Taylor figure test) functions compared with those in normal controls and (2) JVR

188 combined with high RAP was associated with these cognitive impairments.

189 We previously reported that the prevalence of JVR in the general population (16–89 years old)  
190 is approximately 18–36% on the right side and 6–29% on the left side [19]. The present study  
191 showed a high frequency of JVR (50–55%) in patients with SMR. Chronic SMR with a continuous  
192 or repeated elevated central venous pressure might wear and tear the IJV valves and lead to valvular  
193 incompetence. This postulation is supported by a high RAP found in our SMR patients and the other  
194 studies showing a higher frequency of JVR in heart failure or tricuspid valve disease which have  
195 elevated central venous via elevated RAP.

196 Although retrogradely transmitted venous pressure by JVR has been shown to reach the  
197 cerebral venous system and influence CBF [3-6], the extent of induced cerebral venous hypertension  
198 is milder than that of the other conditions, such as dural arteriovenous fistula (DAVF) [20-22].  
199 Therefore, compared with diffuse cerebral white matter hyperintensities (WMH) caused by DAVF  
200 [20-22], JVR is only associated with WMH over caudal brain (occipital, thalamus, and infratentorial  
201 brain regions) in which venous drainage pathway is closer to IJV [6]. In addition, age is needed to  
202 enhance JVR-related brain insults; JVR is associated with the severity of WMH only in people aged  
203  $\geq 75$  years [6]. The present study had similar observations. Merely the presence of JVR was not  
204 associated with SMR-related cognitive impairment; nevertheless, with the additional high RAP, JVR  
205 was associated with poorer cognitive performances, global cognitive (MMSE), and visuospatial (the  
206 Taylor figure test) functions in patients with SMR (Fig 1). Our results lead to the postulation that

207 high RAP related to heart failure has limited influence on the brain if IJV valves are competent; JVR  
208 with high RAP can cause brain dysfunction via retrogradely transmitted venous pressure only when  
209 IJV valves are incompetent (Fig 2).

210 Several studies on brain–heart axis have emerged, and they have shown a relationship between  
211 cognitive impairment and cardiac diseases [9]. Most studies were focusing on heart failure and little  
212 on the effect of mitral valve disease on cognitive functions [9,23]. Our results showed that compared  
213 with age- and sex-matched normal controls, patients with SMR had poorer global cognitive  
214 performance (MMSE) and visuospatial function (Taylor figure test) after adjusting with educational  
215 level. The diminished significance of association in MMSE after adjusting for cardiovascular risk  
216 factors suggests that more prevalent cardiovascular risk factors such as hypertension, DM, and CKD  
217 might be contributors to poorer global cognitive function in SMR. Notably, the anatomic correlations  
218 of visuospatial function impairment, significantly and independently associated with SMR, include  
219 the occipital lobe, which is one of the JVR-susceptible regions [6]. This result also supports our  
220 postulated mechanism mediating the cognitive impairment in SMR (Fig 2).

221 Cerebral circulation includes artery supply and venous drainage. Both of them are responsible  
222 for adequate CBF and brain metabolic homeostasis [2,24]. Recently, several studies have indicated  
223 that, in addition to maintaining adequate CBF and BBB function, waste and lymphatic clearance are  
224 dependent on cerebral venous drainage [25-27]. However, a greater proportion of studies are  
225 focusing on the arterial side, e.g., cardiac output, when evaluating the relationship between the

226 circulation (heart) and the brain [9]. Results of the present study indicate a role of the venous side in  
227 the impact of cardiac disease on brain dysfunction. We did not find associations between parameters  
228 reflecting the arterial side, such as cardiac index and LVEF and cognitive functions in patients with  
229 SMR. Our results are consistent with those of a recent study [28]. They investigated the association  
230 between various cardiac haemodynamic parameters and the volume of WMH in chronic valvular  
231 heart disease such as mitral valve regurgitation (43.1% of the study population) and found that RAP  
232 is associated with WMH. In their results, instead of cardiac index, LVEF, and other cardiac  
233 hemodynamic parameters, only the mean RAP is significantly, independently, and linearly associated  
234 with the WMH volume. However, they did not investigate the neurological functions and  
235 competence of IJV valves in those patients. The role of JVR on these valvular heart disease-related  
236 WMHs and whether WMH is associated with cognitive impairment as shown in our study were  
237 unclear.

238 The present study has limitations. The study sample size was relatively small. In addition, the  
239 cross-sectional study setting could not establish a causal relationship. Therefore, a larger and  
240 longitudinal study is necessary to validate our postulation. In addition, more investigated tools such  
241 as brain imaging are needed to further evaluate the underlying mechanisms between the cerebral  
242 venous drainage impairment and cognitive abnormalities in SMR.

243

244 **Conclusions**

245 Patients with SMR had poorer cognitive function, particularly in the visuospatial domain, and  
246 JVR combined with high RAP was associated with poorer visuospatial function in these patients.  
247 The results suggest that retrogradely transmitted venous pressure but not low cardiac output might be  
248 involved in the mechanisms mediating the relationship between valvular heart disease and brain  
249 functions. In addition to management for decreasing RAP, IJV valve repair might be a potential  
250 treatment option for cardiac disease-related brain dysfunctions.

251

## 252 **Acknowledgements**

253 The authors received grants from Ministry of Science and Technology and Taipei Veterans  
254 General Hospital, Taiwan (Chung: VGH V105C-055; MOST 104-2314-B-075-MY3; Wang: NSC  
255 101-2314-B-010; NSC 102-2314-B -010-051-MY2; Taipei VGH V104C-059).

256

257

## 258 **References**

- 259 1. Schaller B. Physiology of cerebral venous blood flow: from experimental data in animals to  
260 normal function in humans. *Brain Research Reviews* 2004;46:243-260.
- 261 2. Schaller B, Graf R. Cerebral venous infarction: the pathophysiological concept. *Cerebrovasc Dis*  
262 2004;18:179-188.
- 263 3. Chung CP, Hu HH. Jugular venous reflux. *Journal of Medical Ultrasound* 2008;16:210-222.
- 264 4. Wu IH, Sheng WY, Hu HH, Chung CP. Jugular venous reflux could influence cerebral blood  
265 flow: a transcranial Doppler study. *Acta Neurol Taiwan* 2011;20:15-21.
- 266 5. Chung CP, Hsu HY, Chao AC, Cheng CY, Lin SJ, Hu HH. Jugular venous reflux affects ocular  
267 venous system in transient monocular blindness. *Cerebrovasc Dis* 2010;29:122-129.
- 268 6. Chung CP, Wang PN, Wu YH, Tsao YC, Sheng WY, Lin KN, et al. More severe white matter  
269 changes in the elderly with jugular venous reflux. *Ann Neurol* 2011;69:553-559.
- 270 7. Fisher J, Vaghaiwalla F, Tsitlik J, Levin H, Brinker J, Weisfeldt M, et al. Determinants and  
271 clinical significance of jugular venous valve competence. *Circulation* 1982;65:188-196.
- 272 8. Dresser LP, McKinney WM. Anatomic and pathophysiologic studies of the human internal  
273 jugular valve. *Am J Surg* 1987;154:220-224.
- 274 9. Cannon JA, Moffitt P, Perez-Moreno AC, Walters MR, Broomfield NM, McMurray JJV, et al.  
275 Cognitive Impairment and Heart Failure: Systematic Review and Meta-Analysis. *J Card Fail*  
276 2017;23:464-475.



- 277 10. Asgar AW, Mack MJ, Stone GW. Secondary mitral regurgitation in heart failure:  
278 pathophysiology, prognosis, and therapeutic considerations. *J Am Coll Cardiol*  
279 2015;65:1231-1248.
- 280 11. Harb SC, Griffin BP. Mitral Valve Disease: a Comprehensive Review. *Curr Cardiol Rep*  
281 2017;19:73.
- 282 12. Jones DW, Hall JE. Seventh report of the Joint National Committee on Prevention, Detection,  
283 Evaluation, and Treatment of High Blood Pressure and evidence from new hypertension trials.  
284 *Hypertension* 2004;43:1-3.
- 285 13. American Diabetes Association. Diagnosis and classification of diabetes mellitus. *Diabetes Care*  
286 2010;33 Suppl 1:S62-69.
- 287 14. Levey AS, Eckardt KU, Tsukamoto Y, Levin A, Coresh J, Rossert J. Definition and classification  
288 of chronic kidney disease: a position statement from *Kidney Disease: Improving Global*  
289 *Outcomes (KDIGO)*. *Kidney Int* 2005;67:2089-2100.
- 290 15. Nishimura RA, Otto CM, Bonow RO, Carabello BA, Erwin JP 3rd, Fleisher LA, et al. 2017  
291 AHA/ACC Focused Update of the 2014 AHA/ACC Guideline for the Management of Patients  
292 With Valvular Heart Disease: A Report of the American College of Cardiology/American Heart  
293 Association Task Force on Clinical Practice Guidelines. *J Am Coll Cardiol* 2017;70:252-289.
- 294 16. Chang CC, Kramer JH, Lin KN, Chang WN, Wang YL, Huang CW, et al. Validating the Chinese  
295 version of the Verbal Learning Test for screening Alzheimer's disease. *Journal of the*

- 296 International Neuropsychological Society: JINS 2010;16:244-251.
- 297 17. Liu HC, Lin KN, Teng EL, Wang SJ, Fuh JL, Guo NW, et al. Prevalence and subtypes of  
298 dementia in Taiwan: a community survey of 5297 individuals. Journal of the American Geriatrics  
299 Society 1995;43:144-149.
- 300 18. Hester RL, Kinsella GJ, Ong B. Effect of age on forward and backward span tasks. Journal of the  
301 International Neuropsychological Society: JINS 2004;10:475-481.
- 302 19. Chung CP, Lin YJ, Chao AC, Lin SJ, Chen YY, Wang YJ, et al. Jugular venous hemodynamic  
303 changes with aging. Ultrasound Med Biol 2010;36:1776-1782.
- 304 20. Waragai M, Takeuchi H, Fukushima T, Haisa T, Yonemitsu T. MRI and SPECT studies of dural  
305 arteriovenous fistulas presenting as pure progressive dementia with leukoencephalopathy: a cause  
306 of treatable dementia. Eur J Neurol 2006;13:754-759.
- 307 21. Yamakami I, Kobayashi E, Yamaura A. Diffuse white matter changes caused by dural  
308 arteriovenous fistula. J Clin Neurosci 2001;8:471-475.
- 309 22. Zeidman SM, Monsein LH, Arosarena O, Aletich V, Biafore JA, Dawson RC, et al. Reversibility  
310 of white matter changes and dementia after treatment of dural fistulas. AJNR Am J Neuroradiol  
311 1995;16:1080-1083.
- 312 23. Nikendei C, Schäfer H, Weisbrod M, Huber J, Geis N, Katus HA, et al. The Effects of Mitral  
313 Valve Repair on Memory Performance, Executive Function, and Psychological Measures in  
314 Patients With Heart Failure. Psychosom Med 2016;78:432-442.

- 315 24. Pantoni L. Cerebral small vessel disease: from pathogenesis and clinical characteristics to  
316 therapeutic challenges. *Lancet Neurol* 2010;9:689-701.
- 317 25. Kress BT, Iliff JJ, Xia M, Wang M, Wei HS, Zeppenfeld D, et al. Impairment of paravascular  
318 clearance pathways in the aging brain. *Ann Neurol* 2014;76:845-861.
- 319 26. Iliff JJ, Wang M, Liao Y, Plogg BA, Peng W, Gundersen GA, et al. A paravascular pathway  
320 facilitates CSF flow through the brain parenchyma and the clearance of interstitial solutes,  
321 including amyloid  $\beta$ . *Sci Transl Med* 2012;4:147ra111.
- 322 27. Louveau A, Smirnov I, Keyes TJ, Eccles JD, Rouhani SJ, Peske JD, et al. Structural and  
323 functional features of central nervous system lymphatic vessels. *Nature* 2015;523:337-341.
- 324 28. Lee WJ, Jung KH, Ryu YJ, Kim JM, Lee ST, Chu K, et al. Association of Cardiac Hemodynamic  
325 Factors With Severity of White Matter Hyperintensities in Chronic Valvular Heart Disease.  
326 *JAMA Neurol* 2018;75:80-87.

327

328

329

330

331

332

333

334 **Figure Legends**

335 **Figure 1. Cognitive functions in four groups of patients with severe mitral valve regurgitation**  
336 **classified according to the presence or absence of jugular venous reflux and high right atrial**  
337 **pressure.**

338 **Figure 2. Postulated role of jugular venous valve incompetence (jugular venous reflux) in the**  
339 **mechanisms mediating the relationship between cardiac diseases with elevated right atrial**  
340 **pressure and cognitive impairment.**

341

342

343 **Table 1. Comparisons of demographics and cognitive functions between patients with severe**  
 344 **mitral regurgitation and normal controls**

|                                                                  | <b>SMR</b><br><b>(n = 40)</b> | <b>Control</b><br><b>(n = 40)</b> | <b>P</b> |
|------------------------------------------------------------------|-------------------------------|-----------------------------------|----------|
| Age, years, mean (SD, range)                                     | 71.1 (12.2, 38-89)            | 71.1 (12.2, 38-89)                | -        |
| Sex, man, n (%)                                                  | 30 (75.0)                     | 30 (75.0)                         | -        |
| Education, years, mean (SD)                                      | 10.6 (4.8)                    | 10.3 (4.9)                        | 0.903    |
| Hypertension, n (%)                                              | 22 (55.0)                     | 15 (37.5)                         | 0.178    |
| Diabetes mellitus, n (%)                                         | 8 (20.0)                      | 5 (12.5)                          | 0.546    |
| Hyperlipidemia, n (%)                                            | 10 (25.0)                     | 3 (7.5)                           | 0.066    |
| Cigarette smoking, n (%)                                         | 12 (30.0)                     | 13 (32.5)                         | 1.000    |
| Chronic kidney disease, n (%)                                    | 20 (50.0)                     | 5 (5.0)                           | <0.001   |
| <b>Age, sex, education adjusted</b>                              |                               |                                   |          |
| MMSE, mean (SD)                                                  | 26.1 (5.1)                    | 27.8 (2.4)                        | 0.020    |
| Verbal memory: CVVLT 10 min, mean (SD)                           | 6.4 (3.0)                     | 6.9 (1.8)                         | 0.387    |
| Executive function: digit backward test, mean (SD)               | 5.4 (2.7)                     | 6.4 (3.0)                         | 0.081    |
| Visuospatial function: the Taylor complex figure test, mean (SD) | 29.8 (6.9)                    | 31.9 (4.0)                        | 0.040    |

345 SMR = severe mitral regurgitation; CVVLT = Chinese Version of the Verbal Learning Test.

346 **Table 2. Hemodynamic parameters in patients with severe mitral regurgitation**

|                                                   |                    |
|---------------------------------------------------|--------------------|
| LV ejection fraction, %, (SD, range)              | 47.3 (12.6, 25-70) |
| Cardiac index, l/min/m <sup>2</sup> , (SD, range) | 3.5 (1.0, 2.1-6.1) |
| PAWP, mmHg, (SD, range)                           | 25.2 (10.4, 9-47)  |
| PAP, mmHg, (SD, range)                            | 34.7 (10.7, 17-59) |
| RVP, mmHg, (SD, range)                            | 12.3 (7.3, 1-34)   |
| RAP, mmHg, (SD, range)                            | 11.9 (5.9, 4-24)   |
| Right JVR, n (%)                                  | 20 (50.0)          |
| Left JVR, n (%)                                   | 22 (55.0)          |

347 LV = left ventricle; PAWP = pulmonary artery wedge pressure; PAP = pulmonary artery pressure;

348 RVP = right ventricular pressure; RAP = right atrial pressure; JVR = jugular venous reflux.

349

350 **Table 3. Associations of cardiac parameters with cognitive functions in patients with severe**  
 351 **mitral regurgitation**

|                           | <b>Mini-Mental Status Examination</b>                        |                       |                    |                       |
|---------------------------|--------------------------------------------------------------|-----------------------|--------------------|-----------------------|
|                           | B (95% CI)                                                   | <i>P</i> <sup>a</sup> | B (95% CI)         | <i>P</i> <sup>b</sup> |
| LVEF                      | 0.04 (-0.08-0.16)                                            | 0.532                 |                    |                       |
| Cardiac index             | -1.03 (-2.77-0.72)                                           | 0.232                 |                    |                       |
| RAP                       | -0.05 (-0.27-0.17)                                           | 0.640                 |                    |                       |
| RAP > 12 mmHg             | -1.33 (-3.79-1.13)                                           | 0.278                 |                    |                       |
| Right JVR                 | -1.14 (-4.49-2.21)                                           | 0.494                 |                    |                       |
| Left JVR                  | -0.72 (-4.04-2.61)                                           | 0.664                 |                    |                       |
| Right JVR & RAP > 12 mmHg | -2.83 (-5.46-0.20)                                           | 0.036                 | -3.05 (-5.92-0.19) | 0.038                 |
| Left JVR & RAP > 12 mmHg  | -2.77 (-5.52-0.02)                                           | 0.048                 | -2.96 (-5.89-0.02) | 0.048                 |
|                           | <b>Visuospatial function: the Taylor complex figure test</b> |                       |                    |                       |
|                           | B (95% CI)                                                   | <i>P</i> <sup>a</sup> | B (95% CI)         | <i>P</i> <sup>b</sup> |
| LVEF                      | 0.10 (-0.05-0.28)                                            | 0.237                 |                    |                       |
| Cardiac index             | 0.10 (-2.58-2.79)                                            | 0.936                 |                    |                       |
| RAP                       | -0.08 (-0.44-0.28)                                           | 0.648                 |                    |                       |
| RAP > 12 mmHg             | -0.92 (-4.93-3.10)                                           | 0.642                 |                    |                       |

|                           |                    |       |                    |       |
|---------------------------|--------------------|-------|--------------------|-------|
| Right JVR                 | -1.51 (-6.11-3.09) | 0.507 |                    |       |
| Left JVR                  | -3.05 (-7.47-1.37) | 0.169 |                    |       |
| Right JVR & RAP > 12 mmHg | -4.52 (-8.89-0.16) | 0.043 | -4.93 (-9.56-0.30) | 0.038 |
| Left JVR & RAP > 12 mmHg  | -4.56 (-8.81-0.30) | 0.037 | -4.96 (-9.40-0.52) | 0.030 |

352 LVEF = left ventricle ejection fraction; RAP = right atrial pressure; JVR = jugular venous reflux; B  
353 = B coefficient; CI = confidence interval.

354 <sup>a</sup>adjusted for age, sex and education years. <sup>b</sup>adjusted for age, sex, education years and cardiovascular  
355 risk factors (hypertension, diabetes mellitus, hyperlipidemia, cigarette smoking, alcohol consumption,  
356 and chronic kidney disease).



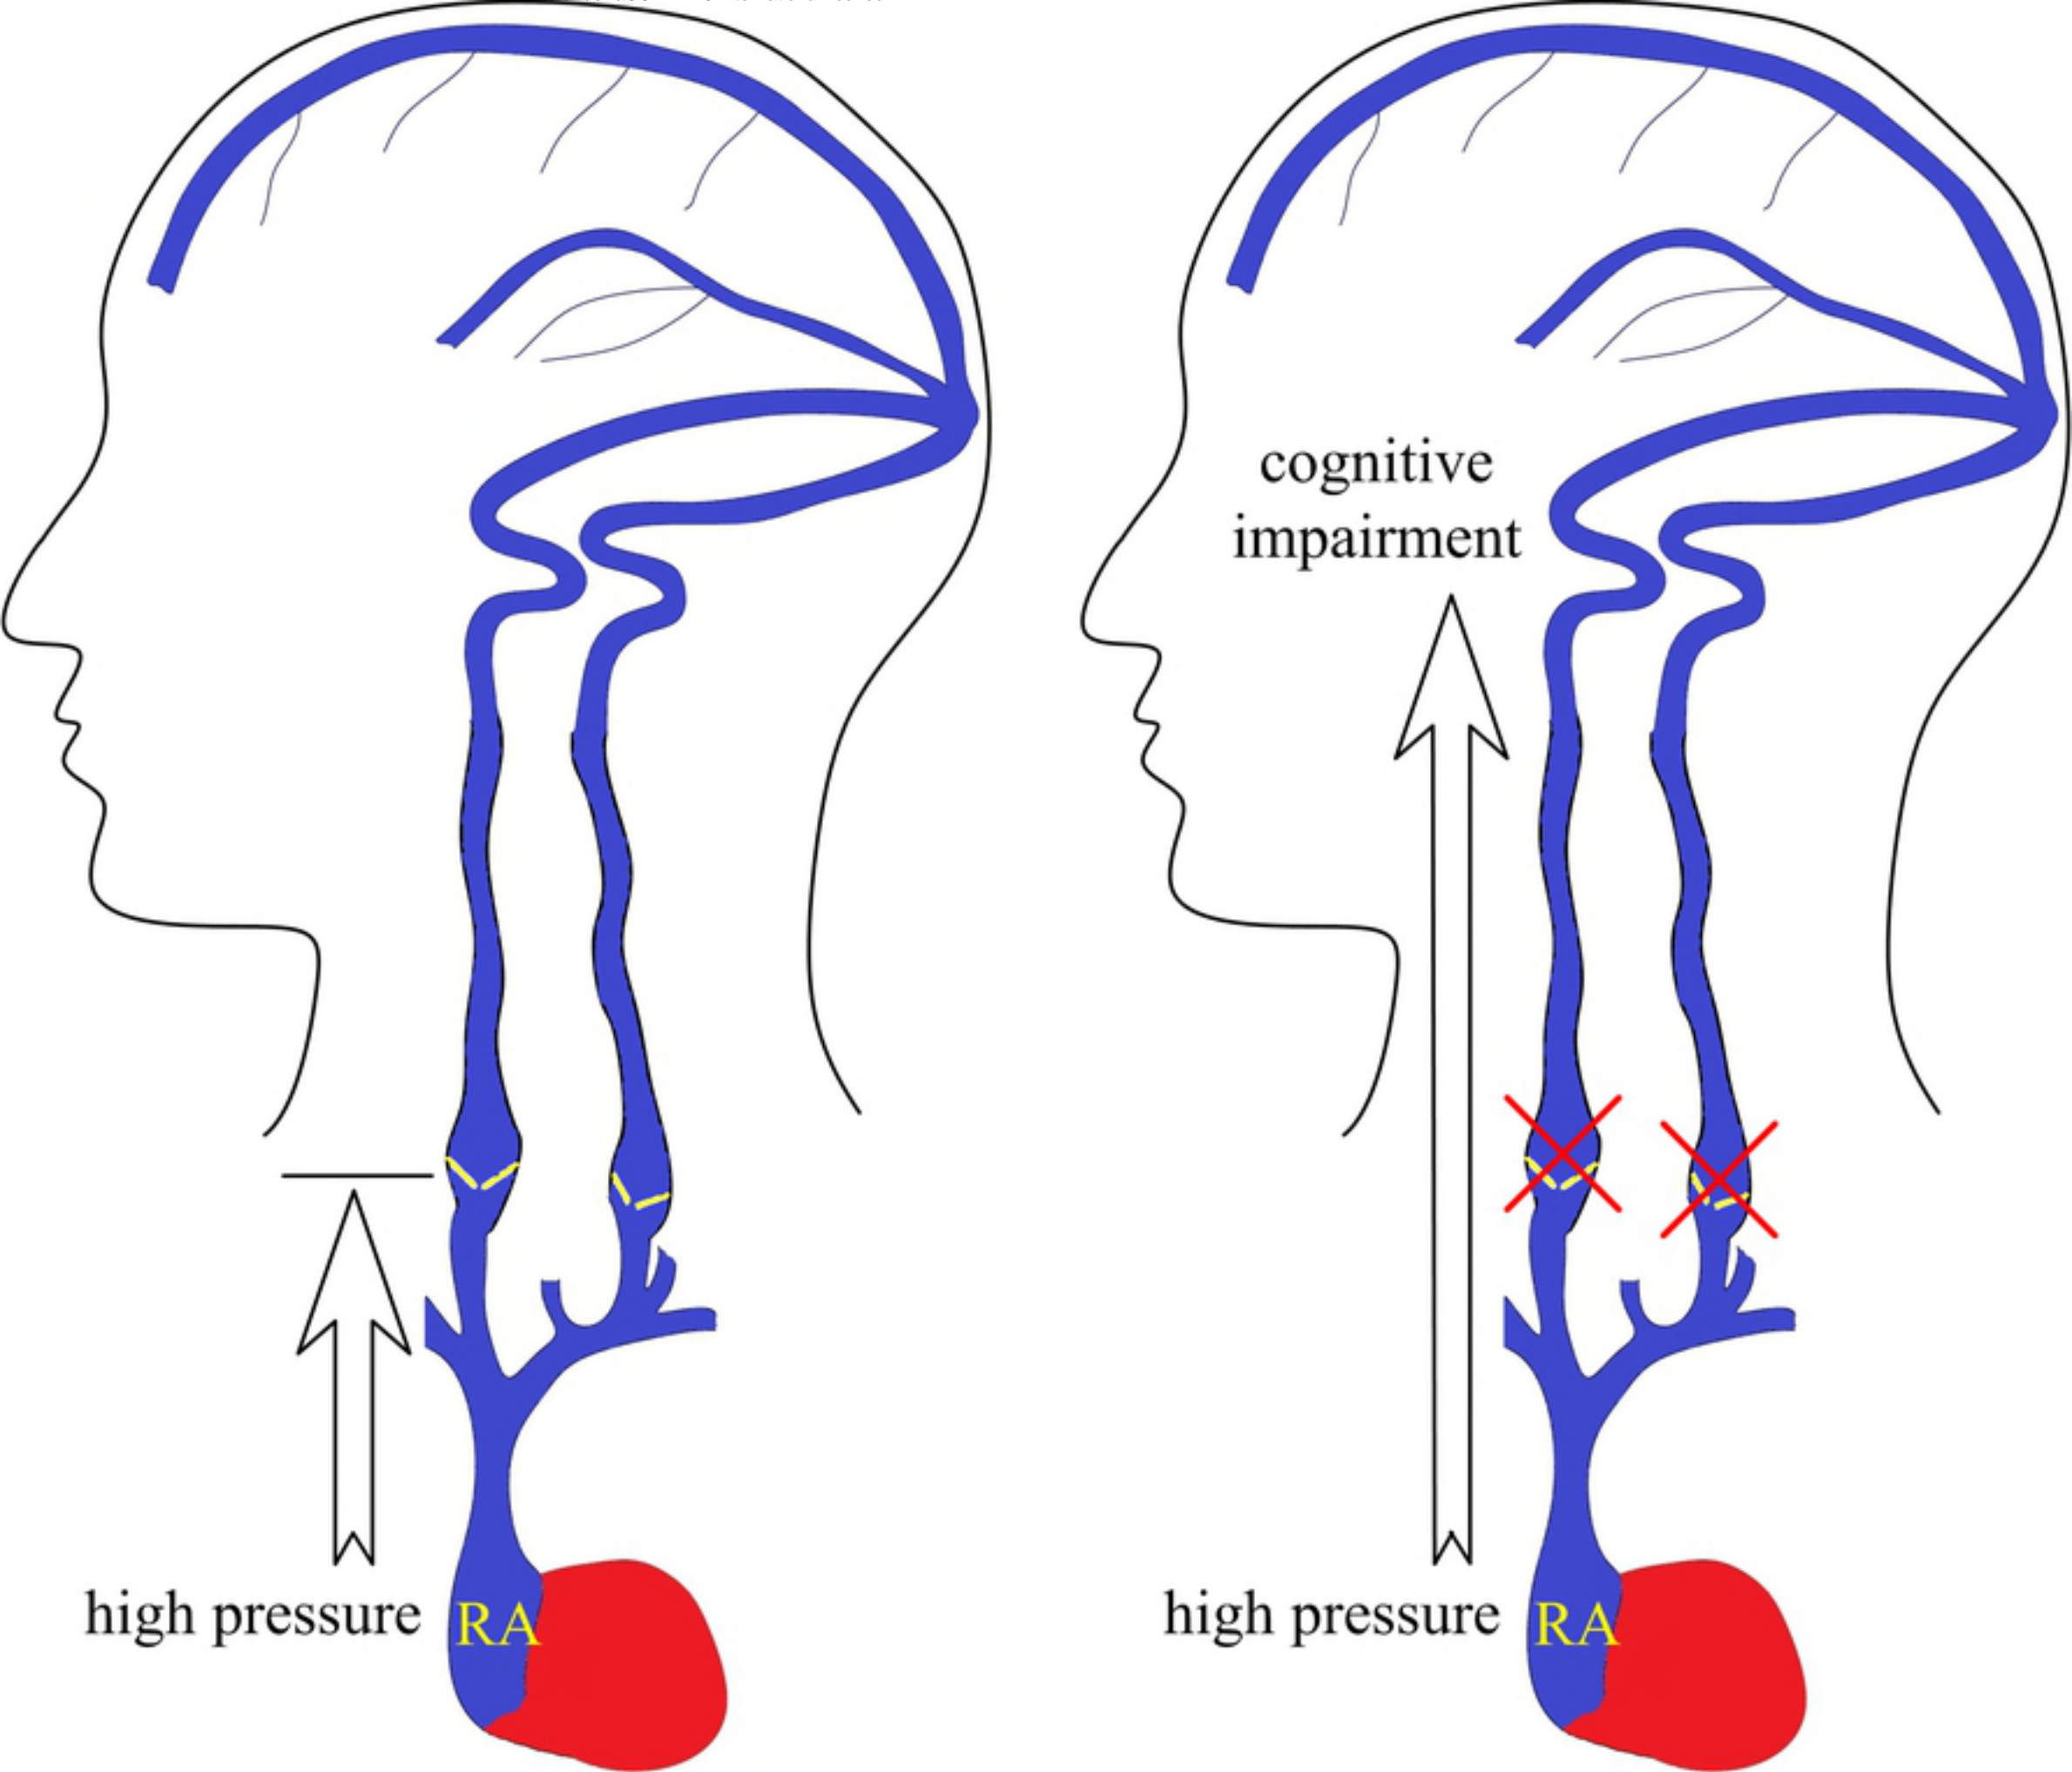

Figure 2

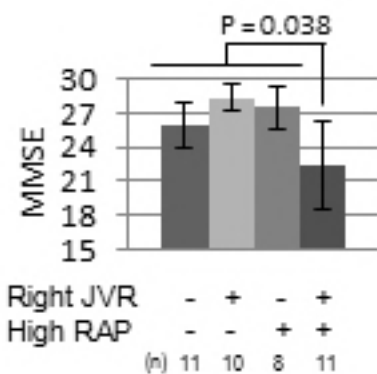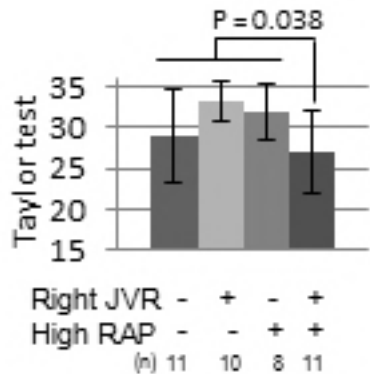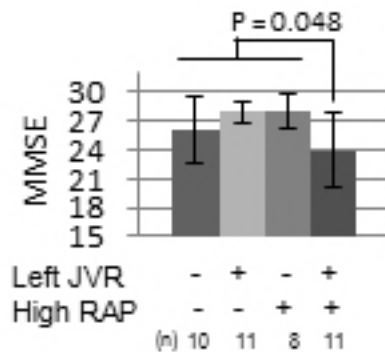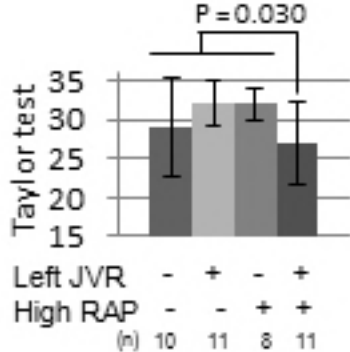

Figure 1
